# Supplementary material for: Somatic, Genetic and Epigenetic Changes in Nephrogenic Rests and Their Role in the Transformation to Wilms Tumors, a Systematic Review
Source: MDPI journal article supplement (doi:10.3390/cancers15051363), 2023-02-21
Supplement: s1 [file s1]

## **Supplementary Table S1. Search strategy PubMed and EMBASE**

### **PubMed full search**

("nephroblastomatosis"[Title/Abstract] OR "nephrogenic rest\*"[Title/Abstract])  
AND  
("molecular biology"[MeSH Terms] OR "molecular" [Title/Abstract] OR "biochemical"[Title/Abstract]  
OR "biomarker\*"[Title/Abstract] OR "mutation\*"[Title/Abstract])

*Last performed: 25th of January 2022*

*Total of 79 results*

### **EMBASE full search**

'nephroblastomatosis'/exp OR 'nephroblastomatosis' OR 'nephroblastomatosis':ti,ab,kw OR  
'nephrogenic rest\*':ti,ab,kw  
AND  
'biochemistry'/exp OR 'biochemistry':ti,ab,kw OR 'mutation'/exp OR 'mutation':ti,ab,kw OR 'molecular  
biology'/exp OR 'molecular biology':ti,ab,kw OR 'molecular':ti,ab,kw OR 'biomarker'/exp OR  
'biomarker':ti,ab,kw

*Last performed: 25th of January 2022*

*Total of 124 results (without MEDLINE)*

**Supplementary Table S2a. “Standards for Reporting Diagnostic Accuracy 2015” (STARD 2015) checklist**

| Section & Topic          | No         | Item                                                                                                                                                   | Reported on page # |
|--------------------------|------------|--------------------------------------------------------------------------------------------------------------------------------------------------------|--------------------|
| <b>TITLE OR ABSTRACT</b> |            |                                                                                                                                                        |                    |
|                          | <b>1</b>   | Identification as a study of diagnostic accuracy using at least one measure of accuracy (such as sensitivity, specificity, predictive values, or AUC)  |                    |
| <b>ABSTRACT</b>          |            |                                                                                                                                                        |                    |
|                          | <b>2</b>   | Structured summary of study design, methods, results, and conclusions (for specific guidance, see STARD for Abstracts)                                 |                    |
| <b>INTRODUCTION</b>      |            |                                                                                                                                                        |                    |
|                          | <b>3</b>   | Scientific and clinical background, including the intended use and clinical role of the index test                                                     |                    |
|                          | <b>4</b>   | Study objectives and hypotheses                                                                                                                        |                    |
| <b>METHODS</b>           |            |                                                                                                                                                        |                    |
| <i>Study design</i>      | <b>5</b>   | Whether data collection was planned before the index test and reference standard were performed (prospective study) or after (retrospective study)     |                    |
| <i>Participants</i>      | <b>6</b>   | Eligibility criteria                                                                                                                                   |                    |
|                          | <b>7</b>   | On what basis potentially eligible participants were identified (such as symptoms, results from previous tests, inclusion in registry)                 |                    |
|                          | <b>8</b>   | Where and when potentially eligible participants were identified (setting, location and dates)                                                         |                    |
|                          | <b>9</b>   | Whether participants formed a consecutive, random or convenience series                                                                                |                    |
| <i>Test methods</i>      | <b>10a</b> | Index test, in sufficient detail to allow replication                                                                                                  |                    |
|                          | <b>10b</b> | Reference standard, in sufficient detail to allow replication                                                                                          |                    |
|                          | <b>11</b>  | Rationale for choosing the reference standard (if alternatives exist)                                                                                  |                    |
|                          | <b>12a</b> | Definition of and rationale for test positivity cut-offs or result categories of the index test, distinguishing pre-specified from exploratory         |                    |
|                          | <b>12b</b> | Definition of and rationale for test positivity cut-offs or result categories of the reference standard, distinguishing pre-specified from exploratory |                    |
|                          | <b>13a</b> | Whether clinical information and reference standard results were available to the performers/readers of the index test                                 |                    |
|                          | <b>13b</b> | Whether clinical information and index test results were available to the assessors of the reference standard                                          |                    |
| <i>Analysis</i>          | <b>14</b>  | Methods for estimating or comparing measures of diagnostic accuracy                                                                                    |                    |
|                          | <b>15</b>  | How indeterminate index test or reference standard results were handled                                                                                |                    |
|                          | <b>16</b>  | How missing data on the index test and reference standard were handled                                                                                 |                    |
|                          | <b>17</b>  | Any analyses of variability in diagnostic accuracy, distinguishing pre-specified from exploratory                                                      |                    |
|                          | <b>18</b>  | Intended sample size and how it was determined                                                                                                         |                    |
| <b>RESULTS</b>           |            |                                                                                                                                                        |                    |
| <i>Participants</i>      | <b>19</b>  | Flow of participants, using a diagram                                                                                                                  |                    |
|                          | <b>20</b>  | Baseline demographic and clinical characteristics of participants                                                                                      |                    |
|                          | <b>21a</b> | Distribution of severity of disease in those with the target condition                                                                                 |                    |
|                          | <b>21b</b> | Distribution of alternative diagnoses in those without the target condition                                                                            |                    |

|                          |           |                                                                                                             |  |
|--------------------------|-----------|-------------------------------------------------------------------------------------------------------------|--|
|                          | <b>22</b> | Time interval and any clinical interventions between index test and reference standard                      |  |
| <i>Test results</i>      | <b>23</b> | Cross tabulation of the index test results (or their distribution) by the results of the reference standard |  |
|                          | <b>24</b> | Estimates of diagnostic accuracy and their precision (such as 95% confidence intervals)                     |  |
|                          | <b>25</b> | Any adverse events from performing the index test or the reference standard                                 |  |
| <b>DISCUSSION</b>        |           |                                                                                                             |  |
|                          | <b>26</b> | Study limitations, including sources of potential bias, statistical uncertainty, and generalisability       |  |
|                          | <b>27</b> | Implications for practice, including the intended use and clinical role of the index test                   |  |
| <b>OTHER INFORMATION</b> |           |                                                                                                             |  |
|                          | <b>28</b> | Registration number and name of registry                                                                    |  |
|                          | <b>29</b> | Where the full study protocol can be accessed                                                               |  |
|                          | <b>30</b> | Sources of funding and other support; role of funders                                                       |  |

Supplementary Table S2b. Case report guidelines (CARE checklist 2013)



**CARE**  
case report guidelines

**CARE Checklist of information to include when writing a case report**




| Topic                       | Item | Checklist item description                                                                                   | Reported on Line                                         |
|-----------------------------|------|--------------------------------------------------------------------------------------------------------------|----------------------------------------------------------|
| Title                       | 1    | The diagnosis or intervention of primary focus followed by the words "case report" .....                     | _____                                                    |
| Key Words                   | 2    | 2 to 5 key words that identify diagnoses or interventions in this case report, including "case report" ....  | _____                                                    |
| Abstract<br>(no references) | 3a   | Introduction: What is unique about this case and what does it add to the scientific literature? .....        | _____                                                    |
|                             | 3b   | Main symptoms and/or important clinical findings .....                                                       | _____                                                    |
|                             | 3c   | The main diagnoses, therapeutic interventions, and outcomes .....                                            | _____                                                    |
|                             | 3d   | Conclusion—What is the main "take-away" lesson(s) from this case? .....                                      | _____                                                    |
| Introduction                | 4    | One or two paragraphs summarizing why this case is unique (may include references) .....                     | _____                                                    |
| Patient Information         | 5a   | De-identified patient specific information .....                                                             | _____                                                    |
|                             | 5b   | Primary concerns and symptoms of the patient .....                                                           | _____                                                    |
|                             | 5c   | Medical, family, and psycho-social history including relevant genetic information .....                      | _____                                                    |
|                             | 5d   | Relevant past interventions with outcomes .....                                                              | _____                                                    |
| Clinical Findings           | 6    | Describe significant physical examination (PE) and important clinical findings. ....                         | _____                                                    |
| Timeline                    | 7    | Historical and current information from this episode of care organized as a timeline .....                   | _____                                                    |
| Diagnostic Assessment       | 8a   | Diagnostic testing (such as PE, laboratory testing, imaging, surveys) .....                                  | _____                                                    |
|                             | 8b   | Diagnostic challenges (such as access to testing, financial, or cultural) .....                              | _____                                                    |
|                             | 8c   | Diagnosis (including other diagnoses considered) .....                                                       | _____                                                    |
|                             | 8d   | Prognosis (such as staging in oncology) where applicable .....                                               | _____                                                    |
| Therapeutic Intervention    | 9a   | Types of therapeutic intervention (such as pharmacologic, surgical, preventive, self-care) .....             | _____                                                    |
|                             | 9b   | Administration of therapeutic intervention (such as dosage, strength, duration) .....                        | _____                                                    |
|                             | 9c   | Changes in therapeutic intervention (with rationale) .....                                                   | _____                                                    |
| Follow-up and Outcomes      | 10a  | Clinician and patient-assessed outcomes (if available) .....                                                 | _____                                                    |
|                             | 10b  | Important follow-up diagnostic and other test results .....                                                  | _____                                                    |
|                             | 10c  | Intervention adherence and tolerability (How was this assessed?) .....                                       | _____                                                    |
|                             | 10d  | Adverse and unanticipated events .....                                                                       | _____                                                    |
| Discussion                  | 11a  | A scientific discussion of the strengths AND limitations associated with this case report .....              | _____                                                    |
|                             | 11b  | Discussion of the relevant medical literature with references. ....                                          | _____                                                    |
|                             | 11c  | The scientific rationale for any conclusions (including assessment of possible causes) .....                 | _____                                                    |
|                             | 11d  | The primary "take-away" lessons of this case report (without references) in a one paragraph conclusion ..... | _____                                                    |
| Patient Perspective         | 12   | The patient should share their perspective in one to two paragraphs on the treatment(s) they received .....  | _____                                                    |
| Informed Consent            | 13   | Did the patient give informed consent? Please provide if requested .....                                     | Yes <input type="checkbox"/> No <input type="checkbox"/> |

**Supplementary Table S3a. Quality assessment of 18 out of 23 included articles based on the STARD 2015 checklist**

| STARD-item                  | 1 | 2 | 3 | 4 | 5 | 6 | 7 | 8 | 9 | 10a | 10b | 11 | 12a | 12b | 13a | 13b | 14 | 15 | 16 | 17 | 18 | 19 | 20 | 21a | 21b | 22 | 23 | 24 | 25 | 26 | 27 | 28 | 29 | 30 |
|-----------------------------|---|---|---|---|---|---|---|---|---|-----|-----|----|-----|-----|-----|-----|----|----|----|----|----|----|----|-----|-----|----|----|----|----|----|----|----|----|----|
| Coorens et al. 2019         | N | N | Y | Y | Y | Y | Y | U | U | Y   | N   | N  | N   | N   | U   | U   | Y  | N  | N  | N  | N  | N  | N  | N   | N   | N  | N  | Y  | N  | Y  | Y  | N  | Y  | Y  |
| Wegert et al. 2018          | N | N | Y | Y | Y | Y | Y | U | U | Y   | Y   | U  | Y   | N   | U   | U   | Y  | N  | N  | N  | N  | N  | N  | N   | N   | N  | N  | N  | N  | Y  | Y  | N  | Y  | Y  |
| Charlton et al. 2015        | N | Y | Y | Y | Y | Y | Y | U | U | Y   | N   | N  | Y   | N   | U   | U   | Y  | Y  | Y  | N  | N  | N  | N  | N   | N   | N  | N  | N  | N  | Y  | Y  | N  | Y  | Y  |
| Grill et al. 2010           | N | Y | Y | Y | Y | Y | Y | U | U | Y   | N   | N  | N   | N   | U   | U   | N  | N  | N  | N  | N  | N  | N  | N   | N   | N  | N  | N  | N  | Y  | Y  | N  | N  | Y  |
| Fukuzawa et al. 2010        | N | Y | Y | Y | Y | Y | Y | U | U | Y   | N   | N  | N   | N   | U   | U   | N  | N  | N  | N  | N  | N  | Y  | N   | N   | N  | N  | N  | N  | Y  | Y  | N  | N  | Y  |
| Vuononvirta et al. 2008     | N | Y | Y | Y | Y | Y | Y | U | U | Y   | N   | N  | Y   | N   | U   | U   | Y  | Y  | Y  | N  | N  | N  | N  | N   | N   | N  | N  | Y  | N  | Y  | Y  | N  | N  | Y  |
| Brown et al. 2008           | N | N | Y | Y | Y | Y | Y | U | U | Y   | N   | N  | N   | N   | U   | U   | N  | N  | N  | N  | N  | N  | N  | N   | N   | N  | N  | Y  | N  | Y  | Y  | N  | N  | Y  |
| Chilukamarri et al. 2007    | N | Y | Y | Y | Y | Y | Y | U | U | Y   | N   | N  | N   | N   | U   | U   | Y  | N  | N  | N  | N  | N  | Y  | N   | N   | N  | N  | N  | N  | Y  | Y  | N  | N  | Y  |
| Hancock et al. 2007         | N | Y | Y | Y | Y | Y | Y | U | U | Y   | N   | N  | N   | N   | U   | U   | N  | N  | N  | N  | N  | N  | N  | N   | N   | N  | N  | N  | N  | Y  | Y  | N  | Y  | Y  |
| Fukuzawa et al. 2006        | N | Y | Y | Y | Y | Y | Y | U | U | Y   | N   | N  | N   | N   | U   | U   | Y  | N  | N  | N  | N  | N  | N  | N   | N   | N  | N  | N  | N  | Y  | Y  | N  | N  | Y  |
| Ravenel et al. 2001         | N | Y | Y | Y | Y | Y | Y | U | U | Y   | N   | N  | N   | N   | U   | U   | Y  | N  | N  | N  | N  | N  | N  | N   | N   | N  | N  | Y  | N  | Y  | Y  | N  | N  | Y  |
| Powlesland et al. 1999      | N | Y | Y | Y | Y | Y | Y | U | U | Y   | N   | N  | N   | N   | U   | U   | Y  | Y  | N  | N  | N  | N  | Y  | N   | N   | N  | N  | N  | N  | Y  | Y  | N  | N  | Y  |
| Charles et al. 1998         | N | Y | Y | Y | Y | Y | Y | U | U | Y   | N   | N  | N   | N   | U   | U   | Y  | Y  | N  | N  | N  | N  | Y  | N   | N   | N  | N  | N  | N  | Y  | Y  | N  | N  | N  |
| Cui et al. 1997             | N | N | Y | Y | Y | Y | Y | U | U | Y   | N   | N  | N   | N   | U   | U   | N  | N  | N  | N  | N  | N  | Y  | N   | N   | N  | N  | N  | N  | Y  | Y  | N  | N  | Y  |
| Steenman et al. 1997        | N | Y | Y | Y | Y | N | N | U | U | Y   | N   | N  | Y   | N   | U   | U   | N  | N  | N  | N  | N  | N  | Y  | N   | N   | N  | N  | N  | N  | Y  | Y  | N  | N  | Y  |
| Austruy et al. 1995         | N | Y | Y | Y | Y | Y | N | U | U | Y   | N   | N  | N   | N   | U   | U   | N  | N  | N  | N  | N  | N  | N  | N   | N   | N  | N  | N  | N  | Y  | Y  | N  | N  | Y  |
| Yun et al. 1993             | N | Y | Y | Y | Y | N | N | U | U | Y   | N   | N  | N   | N   | U   | U   | N  | N  | N  | N  | N  | N  | Y  | N   | N   | N  | N  | N  | N  | Y  | Y  | N  | N  | Y  |
| Pritchard-Jones et al. 1991 | N | Y | Y | Y | Y | Y | N | U | U | Y   | N   | N  | N   | N   | U   | U   | N  | N  | N  | N  | N  | N  | N  | N   | N   | N  | N  | N  | N  | Y  | Y  | N  | N  | N  |

Y = Present, N = Absent, U = Unclear

Supplementary Table S3b. Quality assessment of 5 out of 23 included articles based on the CARE 2013 checklist

| CARE-item         | 1 | 2 | 3a | 3b | 3c | 3d | 4 | 5a | 5b | 5c | 5d | 6 | 7 | 8a | 8b | 8c | 8d | 9a | 9b | 9c | 10a | 10b | 10c | 10d | 11a | 11b | 11c | 11d | 12 | 13 |
|-------------------|---|---|----|----|----|----|---|----|----|----|----|---|---|----|----|----|----|----|----|----|-----|-----|-----|-----|-----|-----|-----|-----|----|----|
| Chang et al. 2021 | N | N | Y  | Y  | Y  | Y  | Y | Y  | Y  | Y  | N  | Y | N | Y  | N  | Y  | Y  | N  | N  | N  | N   | Y   | N   | N   | Y   | Y   | Y   | Y   | N  | U  |
| Slack et al. 2021 | N | N | Y  | Y  | Y  | Y  | Y | Y  | Y  | Y  | Y  | Y | N | Y  | N  | Y  | Y  | N  | N  | N  | N   | Y   | N   | N   | Y   | Y   | Y   | Y   | N  | U  |
| MdZin et al. 2011 | N | N | Y  | Y  | Y  | Y  | Y | Y  | Y  | N  | Y  | N | N | Y  | N  | Y  | Y  | Y  | N  | Y  | N   | Y   | N   | N   | Y   | Y   | Y   | Y   | N  | U  |
| Hoban et al. 1995 | N | N | Y  | Y  | Y  | N  | N | Y  | Y  | N  | N  | N | N | Y  | N  | Y  | Y  | N  | N  | N  | N   | Y   | N   | N   | Y   | Y   | Y   | Y   | N  | U  |
| Park et al. 1993  | N | N | Y  | Y  | Y  | N  | N | Y  | Y  | Y  | Y  | N | N | Y  | N  | Y  | Y  | Y  | N  | N  | N   | N   | N   | N   | Y   | Y   | Y   | Y   | N  | U  |

Y = Present, N = Absent, U = Unclear
